# Supplementary material
Source: Research Square preprint supplement (doi:10.21203/rs.3.rs-9920080/v1)
Supplement: Supplementary file 1 [file 861cab74202a6f7166508113.docx]

**Supplementary Material**

**Figures**

**
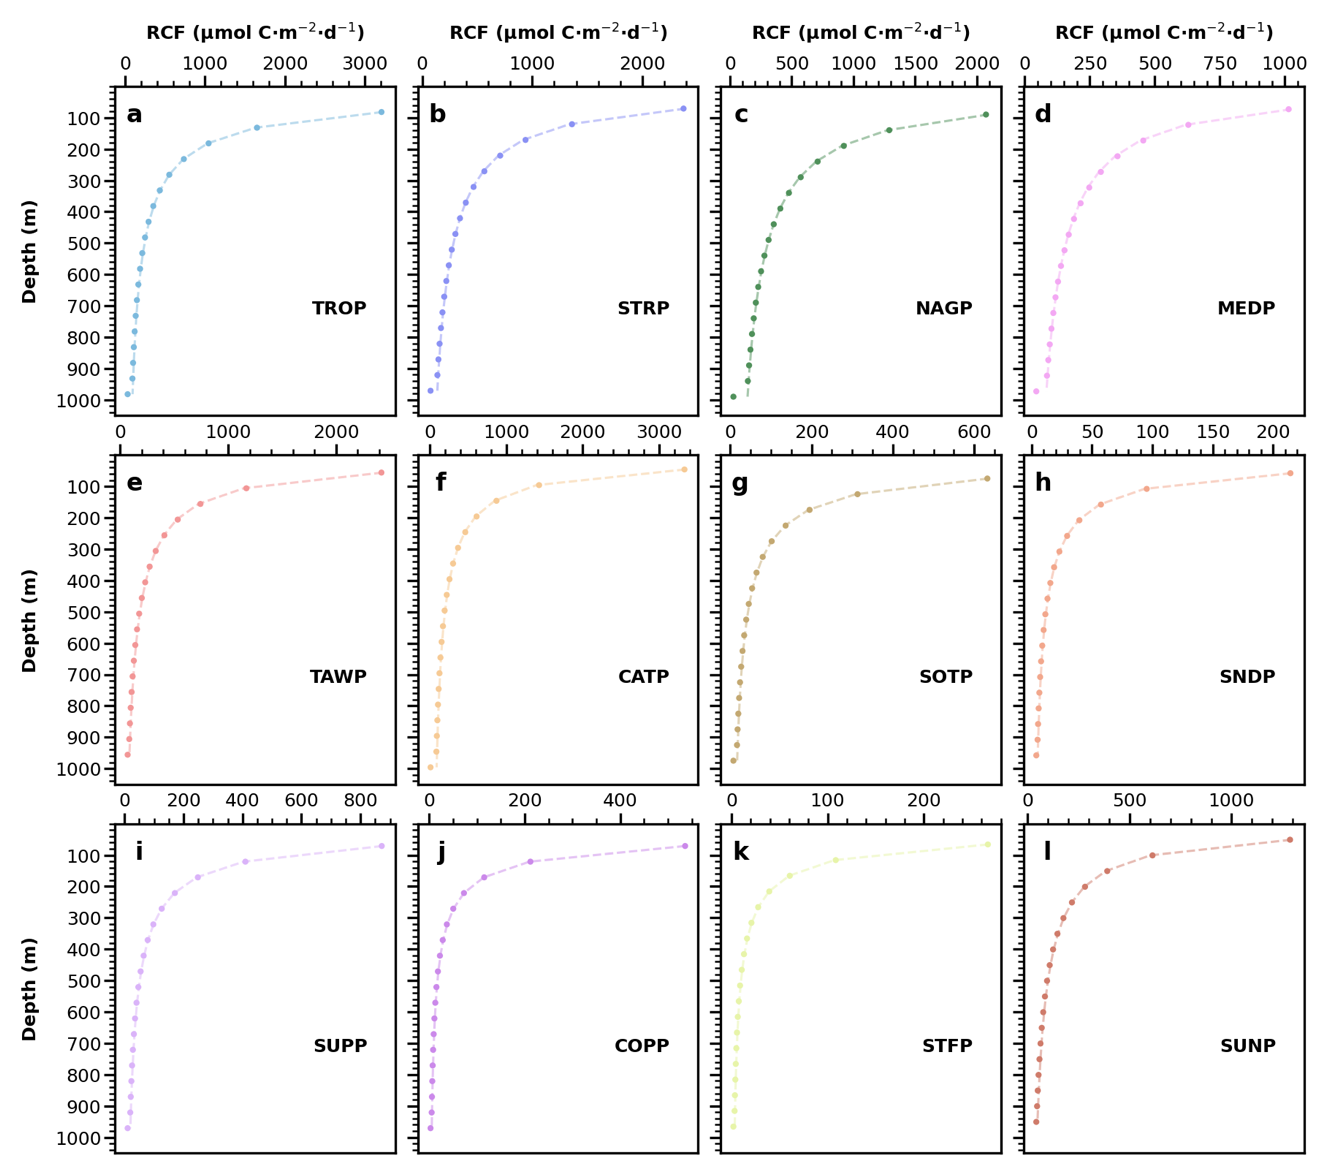
**

**Figure S1.** Vertical profiles of respiratory carbon fluxes (RCF; µmol C·m-2·d-1) calculated as the depth-integrated values from R profiles. The dashed line indicates the Martin curve fits (see Table S2). TROP: Tropical provinces. STGP: Subtropical gyres province. MEDP: Mediterranean and salty water provinces. CATP: Cold and anoxic temperate province. SNDP: Subpolar and nutrient depleted province. COOP: Cold and oxic polar provinces. SUNP: Subpolar oxic northern province. STRP: Subtropical province. NAGP: North Atlantic subtropical gyre province. TAWP: Tropical anoxic water province. SOTP: Southern Ocean temperate province. SUPP: Subpolar province. STFP: Southern subtropical frontal province.

**
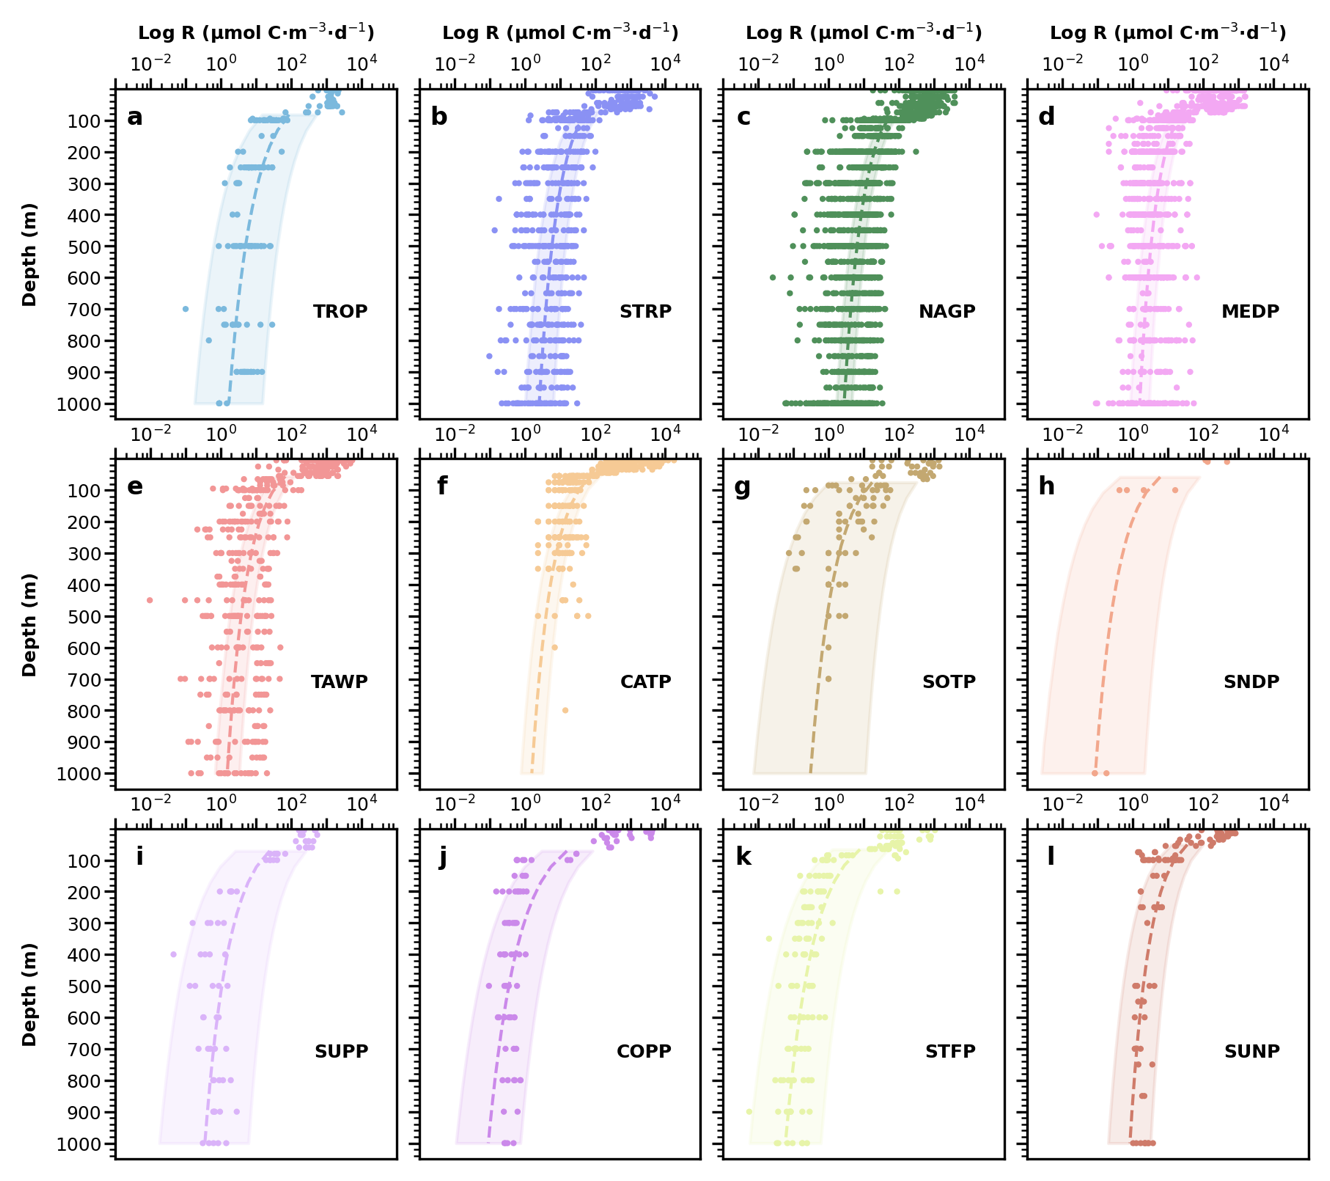
**

**Figure S2.** Vertical profiles of logarithmic respiration rates (R; µmol C·m-3·d-1) derived from ETS measurements. The dashed line shows the power-law model fits (see Table S3). The shaded areas represent the 95% confidence interval. TROP: Tropical provinces. STGP: Subtropical gyres province. MEDP: Mediterranean and salty water provinces. CATP: Cold and anoxic temperate province. SNDP: Subpolar and nutrient depleted province. COOP: Cold and oxic polar provinces. SUNP: Subpolar oxic northern province. STRP: Subtropical province. NAGP: North Atlantic subtropical gyre province. TAWP: Tropical anoxic water province. SOTP: Southern Ocean temperate province. SUPP: Subpolar province. STFP: Southern subtropical frontal province.

**Tables**

**Table S1.** Regional and global carbon budgets. The area (m2) was calculated as the sum of pixels comprising every region. Volume (m3) was calculated as the product of area and the depth of each layer. Mean volumetric respiration rates (µmol C·m-3·d-1) correspond to those shown in Figure 1. Respiration carbon budgets (Gt C·yr-1) were derived as the products of volume and volumetric respiration rates.

|  |  |  | **Volume** | | |  | **Mean Respiration** | | |  | **Respiration** | | |
| --- | --- | --- | --- | --- | --- | --- | --- | --- | --- | --- | --- | --- | --- |
| **MBGP** | **area** | **ZEu** | **Eu** | **Meso** | **Bathy** |  | **Eu** | **Meso** | **Bathy** |  | **Eu** | **Meso** | **Bathy** |
| **1012 m2** | **m (mean ± sd)** | **1012 m3 (mean ± sd)** | | |  | **µmol C·m-3·d-1 (mean ± se)** | | |  | **Gt C·yr-1 (mean ± se)** | | |
| TROP | 52.80 | 82.03 ± 7.80 | 4331.03 ± 411.93 | 48466.07 ± 411.93 | 158391.27 |  | 601.97 ± 108.74 | 13.83 ± 1.65 | 3.01 ± 0.45 |  | 11.42 ± 2.08 | 2.94 ± 0.35 | 2.09 ± 0.31 |
| STRP | 43.82 | 70.78 ± 10.12 | 3101.77 ± 443.35 | 40722.34 ± 443.35 | 131472.31 |  | 605.09 ± 49.64 | 15.62 ± 1.49 | 1.64 ± 0.16 |  | 8.22 ± 0.69 | 2.79 ± 0.27 | 0.95 ± 0.09 |
| STGP | 83.45 | 105.26 ± 13.83 | 8784.66 ± 1154.32 | 74668.46 ± 1154.32 | 250359.36 |  | - | - | - |  | - | - | - |
| NAGP | 17.50 | 89.61 ± 17.55 | 1567.86 ± 307.06 | 15929.45 ± 307.06 | 52491.94 |  | 463.06 ± 19.94 | 15.28 ± 0.63 | 2.88 ± 0.23 |  | 3.18 ± 0.15 | 1.07 ± 0.04 | 0.66 ± 0.05 |
| MEDP | 2.85 | 72.66 ± 14.27 | 206.92 ± 40.63 | 2641.04 ± 40.63 | 8543.90 |  | 147.55 ± 17.69 | 3.31 ± 0.26 | 1.52 ± 0.23 |  | 0.13 ± 0.02 | 0.04 ± 0.01 | 0.06 ± 0.01 |
| TAWP | 9.26 | 55.78 ± 10.18 | 516.24 ± 94.23 | 8739.22 ± 94.23 | 27766.39 |  | 1178.66 ± 82.82 | 23.40 ± 5.23 | 0.80 ± 0.17 |  | 2.67 ± 0.21 | 0.90 ± 0.20 | 0.10 ± 0.02 |
| CATP | 4.17 | 45.94 ± 5.18 | 191.42 ± 21.56 | 3975.05 ± 21.56 | 12499.42 |  | 1677.68 ± 146.91 |  | - |  | 1.41 ± 0.13 | 3.41 ± 0.54 | - |
| SOTP | 30.50 | 74.62 ± 12.11 | 2276.11 ± 369.39 | 28228.55 ± 369.39 | 91513.97 |  | 22.84 ± 3.18 | 0.38 ± 0.13 | - |  | 0.23 ± 0.03 | 0.05 ± 0.02 | - |
| SNDP | 12.13 | 57.83 ± 6.57 | 701.35 ± 79.72 | 11427.10 ± 79.72 | 36385.36 |  | 221.36 ± 89.86 | 2.86 ± 2.28 | 0.12 ± 0.06 |  | 0.68 ± 0.28 | 0.14 ± 0.11 | 0.02 ± 0.01 |
| SUPP | 16.80 | 71.71 ± 7.22 | 1204.36 ± 121.22 | 15591.66 ± 121.22 | 50388.08 |  | 294.35 ± 28.13 | 56.89 ± 17.48 | - |  | 1.55 ± 0.15 | 3.88 ± 1.19 | - |
| COPP | 17.61 | 71.16 ± 7.66 | 1253.42 ± 134.90 | 16359.89 ± 134.90 | 52839.91 |  | 1422.57 ± 296.03 | 38.24 ± 18.13 | 2.06 ± 0.33 |  | 7.81 ± 1.64 | 2.74 ± 1.30 | 0.48 ± 0.08 |
| STFP | 18.73 | 66.38 ± 8.13 | 1243.31 ± 152.36 | 17486.52 ± 152.36 | 56189.47 |  | 88.15 ± 19.24 | 0.47 ± 0.07 | 0.12 ± 0.04 |  | 0.48 ± 0.11 | 0.04 ± 0.01 | 0.03 ± 0.01 |
| SUNP | 5.74 | 51.35 ± 3.66 | 294.73 ± 21.01 | 5445.10 ± 21.01 | 17219.49 |  | 328.64 ± 36.69 | 12.43 ± 2.66 | 1.91 ± 0.12 |  | 0.42 ± 0.05 | 0.30 ± 0.06 | 0.14 ± 0.01 |
| All | 315.35 |  | 25673.19 ± 1415.39 | 289690.43 ± 1415.39 | 946060.87 |  | 339.71 ± 24.41 | 14.41 ± 1.50 | 1.09 ± 0.08 |  | 38.2 ± 2.75 | 18.28 ± 1.91 | 4.52 ± 0.34 |

**Table S2.** Parameters of the Martin curve model fitted to respiratory carbon fluxes (RCF)

| **MBGP** | **FCZEu** | **Slope (±sd)** | **R2** |
| --- | --- | --- | --- |
| TROP | 3224.92 ± 16.77 | 1.43 ± 0.01 | 0.990 |
| STRP | 2391.59 ± 17.01 | 1.09 ± 0.01 | 0.990 |
| NAGP | 2092.46 ± 26.18 | 1.12 ± 0.02 | 0.990 |
| MEDP | 1024.70 ± 9.92 | 0.97 ± 0.01 | 0.990 |
| TAWP | 2432.33 ± 9.82 | 1.18 ± 0.01 | 1.000 |
| CATP | 3346.51 ± 21.82 | 1.19 ± 0.01 | 0.990 |
| SNDP | 215.10 ± 0.71 | 1.34 ± 0.01 | 1.000 |
| SOTP | 634.86 ± 2.81 | 1.41 ± 0.08 | 1.000 |
| SUPP | 875.16 ± 3.24 | 1.45 ± 0.01 | 1.000 |
| COPP | 536.55 ± 1.12 | 1.76 ± 0.01 | 1.000 |
| STFP | 267.14 ± 0.64 | 1.62 ± 0.01 | 1.000 |
| SUNP | 1292.33 ± 5.19 | 1.12 ± 0.01 | 1.000 |

**Table S3.** Parameters of the power law model fitted to mesopelagic ETS-derived respiration rates

| **MBGP** | **n** | **R0 (±se)** | **Slope (±sd)** | **R2** |
| --- | --- | --- | --- | --- |
| TROP | 155 | 90324.29 ± 37983.12 | 1.58 ± 0.08 | 0.720 |
| STRP | 667 | 10359.47 ± 2140.66 | 1.20 ± 0.04 | 0.610 |
| STGP |  |  |  |  |
| NAGP | 2001 | 12685.08 ± 1433.70 | 1.22 ± 0.02 | 0.630 |
| MEDP | 1013 | 2426.63 ± 357.60 | 1.06 ± 0.03 | 0.590 |
| TAWP | 510 | 13537.69 ± 2651.55 | 1.31 ± 0.04 | 0.700 |
| CATP | 423 | 15996.20 ± 2341.10 | 1.33 ± 0.04 | 0.760 |
| SOTP | 109 | 14507.85 ± 9645.97 | 1.56 ± 0.14 | 0.540 |
| SNDP | 11 | 2602.02 ± 2259.90 | 1.49 ± 0.18 | 0.880 |
| SUPP | 73 | 22746.40 ± 12322.72 | 1.60 ± 0.10 | 0.780 |
| COPP | 98 | 62789.27 ± 28148.71 | 1.94 ± 0.09 | 0.840 |
| STFP | 163 | 14380.96 ± 6115.98 | 1.79 ± 0.08 | 0.750 |
| SUNP | 108 | 5142.01 ± 1669.99 | 1.26 ± 0.07 | 0.760 |

**Table S4.** Summary of data sources for ETS data.

| **Cruise** | **Depth range (m)** | **Sample Size** | **Profiles** | **Reference** | **Link to reference** | **Database** | **Link to database** |
| --- | --- | --- | --- | --- | --- | --- | --- |
| AMT28 | 0-200 | 109 | 18 | unpublished |  | Robinson et al. (2026) | <https://www.bodc.ac.uk/data/published_data_library/catalogue/10.5285/4b2a5ac6-b6db-c98e-e063-7086abc040c6> |
| ANTARES III | 0-4000 | 105 | 7 | Arístegui et al. (2002) | <https://doi.org/10.1016/S0967-0645(02)00008-5> |  |  |
| ANTARES IV | 0-1200 | 182 | 18 | unpublished |  | Denis & Lefevre (2004) | <https://doi.org/10.1594/PANGAEA.137577> |
| APERO | 0-2000 | 113 | 12 | unpublished |  |  |  |
| F.O.R.V. Sagar Sampada 98 | 200-2000 | 32 | 1a | Naqvi et al. (1996) | <https://doi.org/10.1016/0967-0645(95)00080-1> | Robinson et al. (2026) | <https://www.bodc.ac.uk/data/published_data_library/catalogue/10.5285/4b2a5ac6-b6db-c98e-e063-7086abc040c6> |
| O.R.V. Sagar Kanya 70 | 200-2000 | 19 | 1d | Naqvi et al. (1996) | <https://doi.org/10.1016/0967-0645(95)00080-1> | Robinson et al. (2026) | <https://www.bodc.ac.uk/data/published_data_library/catalogue/10.5285/4b2a5ac6-b6db-c98e-e063-7086abc040c6> |
| ARCHIMEDES I | 0-5000 | 156 | 23 | Baltar et al. (2009) a | <https://doi.org/10.4319/lo.2009.54.1.0182> | Robinson et al. (2026) | <https://www.bodc.ac.uk/data/published_data_library/catalogue/10.5285/4b2a5ac6-b6db-c98e-e063-7086abc040c6> |
| ARCHIMEDES II | 0-2500 | 146 | 28 | Baltar et al. (2009) b | <https://doi.org/10.1111/j.1462-2920.2009.01922.x> | Robinson et al. (2026) | <https://www.bodc.ac.uk/data/published_data_library/catalogue/10.5285/4b2a5ac6-b6db-c98e-e063-7086abc040c6> |
| ARCHIMEDES III | 0-6000 | 128 | 25 | unpublished |  | Robinson et al. (2026) | <https://www.bodc.ac.uk/data/published_data_library/catalogue/10.5285/4b2a5ac6-b6db-c98e-e063-7086abc040c6> |
| ARCOD | 0-700 | 67 | 15 |  |  | Agatova & Lapina (1996) | https://doi.org/10.1594/PANGAEA.759990 |
| BIOSESOII | 100-1600 | 51 | 8 | Azzaro et al. (2006) | <https://doi.org/10.1016/j.marchem.2005.09.011> | Robinson et al. (2026) | <https://www.bodc.ac.uk/data/published_data_library/catalogue/10.5285/4b2a5ac6-b6db-c98e-e063-7086abc040c6> |
| CAIBEX | 0-900 | 57 | 9 | unpublished |  |  |  |
| CAIBOX | 0-3000 | 68 | 15 | unpublished |  |  |  |
| CH-24 | 150-3000 | 9 | 1b | Packard et al. (1988) | <https://doi.org/10.1016/0198-0149(88)90016-7> |  |  |
| COCA I | 0-1000 | 195 | 10 | Arístegui et al. (2020) | <https://doi.org/10.3389/feart.2020.00349> | Robinson et al. (2026) | <https://www.bodc.ac.uk/data/published_data_library/catalogue/10.5285/4b2a5ac6-b6db-c98e-e063-7086abc040c6> |
| COCA II | 0-1000 | 199 | 10 | Arístegui et al. (2020) | <https://doi.org/10.3389/feart.2020.00349> | Robinson et al. (2026) | <https://www.bodc.ac.uk/data/published_data_library/catalogue/10.5285/4b2a5ac6-b6db-c98e-e063-7086abc040c6> |
| DOMES | 150-5000 | 15 | 1c | Packard et al. (1988) | <https://doi.org/10.1016/0198-0149(88)90016-7> |  |  |
| OASIS/ DS282 | 0-2000 | 198 | 10 | unpublished |  | Robinson et al. (2026) | <https://www.bodc.ac.uk/data/published_data_library/catalogue/10.5285/4b2a5ac6-b6db-c98e-e063-7086abc040c6> |
| OASIS/ M60 | 0-3000 | 103 | 5 | unpublished |  | Robinson et al. (2026) | <https://www.bodc.ac.uk/data/published_data_library/catalogue/10.5285/4b2a5ac6-b6db-c98e-e063-7086abc040c6> |
| OASIS/ POS295 | 0-3000 | 83 | 4 | unpublished |  | Robinson et al. (2026) | <https://www.bodc.ac.uk/data/published_data_library/catalogue/10.5285/4b2a5ac6-b6db-c98e-e063-7086abc040c6> |
| OASIS/ POS309 | 0-2500 | 100 | 5 | unpublished |  | Robinson et al. (2026) | <https://www.bodc.ac.uk/data/published_data_library/catalogue/10.5285/4b2a5ac6-b6db-c98e-e063-7086abc040c6> |
| DYFAMED | 200-1000 | 263 | 42 | Lefévre et al. (1996) | <https://doi.org/10.1016/0924-7963(95)00003-8> | Robinson et al. (2026) | <https://www.bodc.ac.uk/data/published_data_library/catalogue/10.5285/4b2a5ac6-b6db-c98e-e063-7086abc040c6> |
| DYNAPROC | 0-2000 | 62 | 4 | Denis et al. (2003) | <https://doi.org/10.1016/S0924-7963(02)00244-0> |  |  |
| e-IMPACT I | 0-1500 | 302 | 39 | García et al. (in prep) |  |  |  |
| e-IMPACT II | 0-1000 | 187 | 30 | García et al. (in prep) |  |  |  |
| EN376 | 0.265 | 55 | 5 | Packard & Christensen (2004) | https://elischolar.library.yale.edu/journal_of_marine_research/38 |  |  |
| FAX | 0-1000 | 179 | 13 | Arístegui et al. (2003) | <https://doi.org/10.3354/ame> | Robinson et al. (2026) | <https://www.bodc.ac.uk/data/published_data_library/catalogue/10.5285/4b2a5ac6-b6db-c98e-e063-7086abc040c6> |
| FL92-1 | 0-500 | 31 | 4 | unpublished |  | Legendre et al. (2013) | https://doi.org/10.1594/PANGAEA.816765 |
| FL92-2 | 0-500 | 45 | 5 | unpublished |  | Legendre et al. (2013) | https://doi.org/10.1594/PANGAEA.816766 |
| FL92-3 | 0-500 | 43 | 4 | unpublished |  | Legendre et al. (2013) | https://doi.org/10.1594/PANGAEA.816767 |
| FL93-1 | 0-350 | 24 | 3 | unpublished |  | Legendre et al. (2013) | https://doi.org/10.1594/PANGAEA.816768 |
| FL93-2 | 0-350 | 28 | 3 | unpublished |  | Legendre et al. (2013) | https://doi.org/10.1594/PANGAEA.816769 |
| FLUXES I | 0-4000 | 52 | 9 | unpublished |  |  |  |
| FRAM III | 0-2000 | 8 | 1 | Packard et al. (2007) | <https://doi.org/10.1016/j.dsr.2006.12.008> | Robinson et al. (2026) | <https://www.bodc.ac.uk/data/published_data_library/catalogue/10.5285/4b2a5ac6-b6db-c98e-e063-7086abc040c6> |
| HOTMIX | 0-4500 | 352 | 29 | unpublished |  |  |  |
| HUD92-1 | 0-345 | 49 | 9 | unpublished |  | Legendre et al. (2013) | https://doi.org/10.1594/PANGAEA.816673 |
| JASON-76 | 0-2000 | 102 | 11 | Packard et al. (2015) | <https://doi.org/10.5194/bg-12-2641-2015> | Robinson et al. (2026) | <https://www.bodc.ac.uk/data/published_data_library/catalogue/10.5285/4b2a5ac6-b6db-c98e-e063-7086abc040c6> |
| KEOPS2 | 0-700 | 72 | 9 |  |  | Robinson et al. (2026) | <https://www.bodc.ac.uk/data/published_data_library/catalogue/10.5285/4b2a5ac6-b6db-c98e-e063-7086abc040c6> |
| LowpHoxII | 0-750 | 11 | 2 | Fernández-Urrozola et al. (2021) | https://aslopubs.onlinelibrary.wiley.com/doi/10.1002/lno.11866 |  |  |
| LU94-1 | 0-325 | 32 | 4 | unpublished |  | Legendre et al. (2013) | https://doi.org/10.1594/PANGAEA.816770 |
| LU94-2 | 0-800 | 67 | 8 | unpublished |  | Legendre et al. (2013) | https://doi.org/10.1594/PANGAEA.816771 |
| MEDTLANTE | 0-2000 | 60 | 5 | Savenkoff et al. (1993) | <https://doi.org/10.1016/0967-0637(93)90067-D> |  |  |
| MESOPELAGIC | 0-1000 | 124 | 9 | Arístegui et al. (2003) | <https://doi.org/10.1029/2002GL016227> |  |  |
| MICOLOR2 | 0-1500 | 192 | 18 | unpublished |  |  |  |
| OceanICU | 1500 | 135 | 10 | unpublished |  |  |  |
| POEM-LIWEX 95 | 0-3900 | 236 | 31 | La Ferla & Azzaro (2001) | <https://doi.org/10.1016/S0967-0637(01)00009-7> | Robinson et al. (2026) | <https://www.bodc.ac.uk/data/published_data_library/catalogue/10.5285/4b2a5ac6-b6db-c98e-e063-7086abc040c6> |
| PUMP | 0-1000 | 116 | 13 | unpublished |  |  |  |
| RODA I | 0-2000 | 123 | 6 | unpublished |  |  |  |
| RODA II | 0-1000 | 229 | 20 | unpublished |  |  |  |
| SUMMER | 0-1000 | 90 | 9 | unpublished |  | Robinson et al. (2026) | <https://www.bodc.ac.uk/data/published_data_library/catalogue/10.5285/4b2a5ac6-b6db-c98e-e063-7086abc040c6> |
| RCP | 0-1500 | 97 | 8 | Lefevre et al. (1996) | <https://doi.org/10.1016/0924-7963(95)00003-8> | Robinson et al. (2026) | <https://www.bodc.ac.uk/data/published_data_library/catalogue/10.5285/4b2a5ac6-b6db-c98e-e063-7086abc040c6> |
| So261 | 0-7000 | 31 | 4 | Fernández-Urrozola et al. (2021) | https://aslopubs.onlinelibrary.wiley.com/doi/10.1002/lno.11866 | Robinson et al. (2026) | <https://www.bodc.ac.uk/data/published_data_library/catalogue/10.5285/4b2a5ac6-b6db-c98e-e063-7086abc040c6> |
| SUCCESSION | 0-380 | 26 | 3 | Osma et al. (2014) | http://dx.doi.org/10.1016/j.jmarsys.2014.01.004 | Robinson et al. (2026) | <https://www.bodc.ac.uk/data/published_data_library/catalogue/10.5285/4b2a5ac6-b6db-c98e-e063-7086abc040c6> |
| TMF2A | 200-1000 | 12 | 2 | unpublished |  |  |  |
| TOMO III | 0-2200 | 58 | 15 | unpublished |  | Prieur & Denis (2004) | <https://doi.org/10.1594/PANGAEA.188893> |
| TRANSAT II | 0-3800 | 119 | 25 | Reinthaler et al. (2006) | <https://doi.org/10.4319/lo.2006.51.3.1262> | Robinson et al. (2026) | <https://www.bodc.ac.uk/data/published_data_library/catalogue/10.5285/4b2a5ac6-b6db-c98e-e063-7086abc040c6> |
| TRATLEQ1/ M158 | 0-4000 | 36 | 8 | unpublished |  |  |  |
| TT32 | 0-2000 | 13 | 3 | Packard et al. (1971) | <https://doi.org/10.4319/lo.1971.16.1.0060> | Robinson et al. (2026) | <https://www.bodc.ac.uk/data/published_data_library/catalogue/10.5285/4b2a5ac6-b6db-c98e-e063-7086abc040c6> |
| TT35 | 0-4800 | 40 | 9 | Packard et al. (1971) | <https://doi.org/10.4319/lo.1971.16.1.0060> | Robinson et al. (2026) | <https://www.bodc.ac.uk/data/published_data_library/catalogue/10.5285/4b2a5ac6-b6db-c98e-e063-7086abc040c6> |
| TT36 | 0-4700 | 13 | 3 | Packard et al. (1971) | <https://doi.org/10.4319/lo.1971.16.1.0060> | Robinson et al. (2026) | <https://www.bodc.ac.uk/data/published_data_library/catalogue/10.5285/4b2a5ac6-b6db-c98e-e063-7086abc040c6> |
| PZ93-1 | 0-250 | 19 | 4 | unpublished |  | Legendre et al. (2013) | https://doi.org/10.1594/PANGAEA.816772 |
